# Supplementary material for: Anti‐tumor efficacy of a novel CLK inhibitor via targeting RNA splicing and MYC‐dependent vulnerability
Source: PubMed Central journal article supplement (PMC5991599; doi:10.15252/emmm.201708289), 2018-05-16
Supplement: EMMM-10-e8289-s002.pdf [file EMMM-10-e8289-s002.pdf]

## Expanded View Figures

**A**

| P-Value Rank | Gene         | Probe              | Fold Change  | P-Value         | Q-Value         | Sensitive Mean | Sensitive StdDev | Resistant Mean | Resistant StdDev |
|--------------|--------------|--------------------|--------------|-----------------|-----------------|----------------|------------------|----------------|------------------|
| 1            | WDR18        | 209461_x_at        | -1.78        | 5.86E-13        | 2.51E-08        | 1149.9         | 387.3            | 646.7          | 262.9            |
| 2            | RBMX_SNORD61 | 213762_x_at        | -1.42        | 5.95E-13        | 1.28E-08        | 8631.4         | 1888.6           | 6083.9         | 1435.0           |
| 3            | CD63         | 200663_at          | 1.61         | 6.22E-13        | 8.89E-09        | 7476.3         | 2994.3           | 12065.6        | 3062.3           |
| 4            | CAD          | 202715_at          | -1.78        | 7.39E-13        | 7.92E-09        | 2144.3         | 767.7            | 1202.0         | 432.1            |
| 5            | SFXN4        | 229236_s_at        | -1.88        | 1.22E-12        | 1.04E-08        | 742.8          | 239.6            | 395.3          | 226.0            |
| 6            | SFXN4        | 225143_at          | -1.86        | 2.67E-12        | 1.91E-08        | 1485.1         | 483.1            | 799.6          | 453.3            |
| 7            | PDCD11       | 212422_at          | -1.69        | 3.53E-12        | 2.16E-08        | 1092.7         | 373.0            | 647.7          | 218.2            |
| 8            | GTPBP3       | 213835_x_at        | -1.33        | 1.11E-11        | 5.94E-08        | 1391.3         | 284.4            | 1049.4         | 190.0            |
| 9            | ANXA5        | 200782_at          | 1.97         | 2.35E-11        | 1.12E-07        | 4240.1         | 2296.0           | 8333.1         | 3505.5           |
| 10           | APEX1        | 210027_s_at        | -1.39        | 2.83E-11        | 1.21E-07        | 9272.5         | 2106.1           | 6649.9         | 1674.7           |
| <b>70</b>    | <b>CLK2</b>  | <b>203229_s_at</b> | <b>-1.47</b> | <b>1.58E-09</b> | <b>9.66E-07</b> | <b>2207.8</b>  | <b>670.0</b>     | <b>1501.2</b>  | <b>461.9</b>     |
|              | CLK1         | 214683_s_at        | -1.21        | 3.69.E-02       | 1.35.E-01       | 561.8          | 275.9            | 466.2          | 203.5            |
|              | CLK3         | 238072_at          | 1.06         | 1.09.E-01       | 2.79.E-01       | 154.1          | 31.5             | 162.7          | 24.6             |
|              | CLK4         | 228751_at          | 1.11         | 2.34.E-01       | 4.47.E-01       | 117.8          | 43.4             | 130.2          | 66.2             |
|              | CLK4         | 241403_at          | -1.06        | 2.54.E-01       | 4.69.E-01       | 63.2           | 19.0             | 59.4           | 16.3             |
|              | CLK3         | 202140_s_at        | -1.05        | 3.38.E-01       | 5.53.E-01       | 1014.9         | 318.5            | 968.9          | 171.0            |
|              | CLK4         | 1568836_at         | -1.03        | 6.00.E-01       | 7.65.E-01       | 40.5           | 10.8             | 39.4           | 11.3             |
|              | CLK4         | 210346_s_at        | 1.01         | 8.84.E-01       | 9.40.E-01       | 439.9          | 156.6            | 444.6          | 186.2            |
|              | DYRK1A       | 209033_s_at        | -1.20        | 9.53.E-03       | 5.17.E-02       | 1970.1         | 747.7            | 1644.7         | 560.2            |
|              | DYRK1A       | 211079_s_at        | -1.06        | 8.83.E-02       | 2.43.E-01       | 109.3          | 20.2             | 103.0          | 19.2             |
|              | DYRK1B       | 217270_s_at        | -1.03        | 4.19.E-01       | 6.26.E-01       | 179.0          | 31.2             | 174.2          | 32.8             |
|              | DYRK1A       | 239308_at          | 1.02         | 4.78.E-01       | 6.74.E-01       | 137.5          | 19.1             | 140.4          | 24.2             |
|              | DYRK1A       | 211541_s_at        | 1.01         | 5.38.E-01       | 7.21.E-01       | 313.7          | 42.6             | 318.2          | 35.3             |
|              | DYRK1B       | 204954_s_at        | 1.01         | 8.57.E-01       | 9.27.E-01       | 214.6          | 38.6             | 216.2          | 56.6             |

**B**

| Gene       | Change            | p-value          |                     | Q-value         | Effect           |
|------------|-------------------|------------------|---------------------|-----------------|------------------|
|            |                   | Student's t-test | Fisher's exact test |                 |                  |
| ZFP106     | Mut               | 1.11E-03         | 2.83E-03            | 5.93E-02        | Sensitive        |
| FBN3       | Mut               | 1.11E-03         | 3.13E-03            | 5.92E-02        | Sensitive        |
| AUTS2      | Mut               | 1.20E-03         | 8.34E-04            | 6.15E-02        | Sensitive        |
| PCM1       | Mut               | 1.69E-03         | 8.34E-04            | 7.39E-02        | Sensitive        |
| CREBBP     | Mut               | 4.99E-03         | 4.63E-03            | 1.25E-01        | Sensitive        |
| UBR4       | Mut               | 5.24E-03         | 1.20E-03            | 1.29E-01        | Sensitive        |
| CHD7       | Mut               | 5.61E-03         | 9.63E-03            | 1.36E-01        | Sensitive        |
| ROBO2      | Mut               | 6.60E-03         | 7.69E-03            | 1.49E-01        | Sensitive        |
| <b>MYC</b> | <b>Mut or Amp</b> | <b>6.66E-03</b>  | <b>8.32E-03</b>     | <b>2.67E-01</b> | <b>Sensitive</b> |
| ARFGEF1    | Mut               | 7.96E-03         | 9.83E-03            | 1.65E-01        | Sensitive        |
| ODZ2       | Mut or Del        | 8.12E-03         | 4.86E-03            | 4.14E-01        | Sensitive        |
| LRRN3      | Mut or Del        | 8.17E-03         | 1.28E-03            | 2.78E-01        | Sensitive        |
| ASXL1      | Amp               | 9.39E-03         | 1.77E-03            | 3.42E-01        | Resistant        |

**Figure EV1. Result of unbiased bioinformatics analysis.**

- A Genes significantly associated with the sensitivity are shown ranked by their *P*-value. Also shown are the results of CLK and DYRK family genes.  
 B Representative gene alterations and their statistical powers. Correlation between T-025 sensitivity and gene alterations in each cell line. The *P*-values were determined using Student's *t*-test and Fisher's exact test.

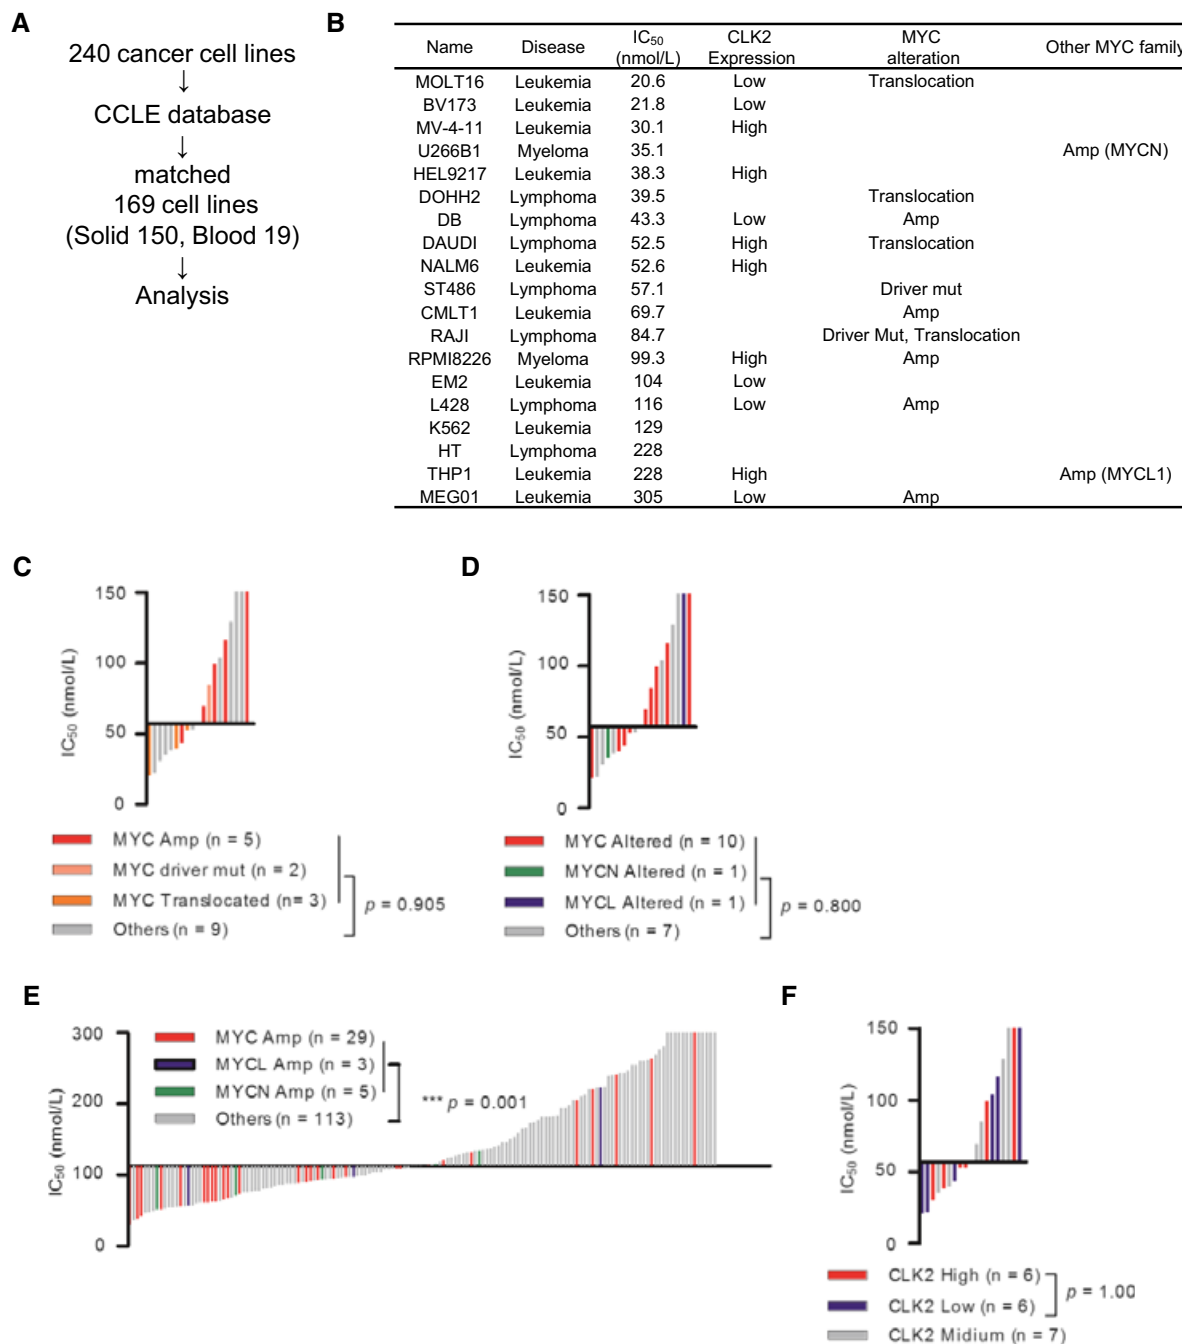**Figure EV2. Additional analysis of Oncopanel.**

A Analysis flow of the tested cell lines.

B IC<sub>50</sub> value, CLK2 expression, and MYC status of 19 hematological cancer cell lines are shown.

C Correlation between T-025 sensitivity and MYC status in the hematological cancer cell lines ( $n = 19$ ). Each bar indicates a single cell line, and colored bar indicates cell lines with altered MYC.

D Correlation between T-025 sensitivity and MYC family gene status in the hematological cancer cell lines ( $n = 19$ ). Each bar indicates a single cell line, and colored bar indicates cell lines with altered MYC family gene.

E Correlation between T-025 sensitivity and MYC family gene status in the solid cancer cell lines ( $n = 150$ ). Each bar indicates a single cell line, and colored bar indicates cell lines with altered MYC family gene.

F Correlation between T-025 sensitivity and CLK2 expression in the hematological cancer cell lines ( $n = 19$ ). Each bar indicates a single cell line, and blue, gray, or red bar indicates cell lines with high, medium, or low CLK2.

Data information: In (C–F), a Mann–Whitney test was performed.

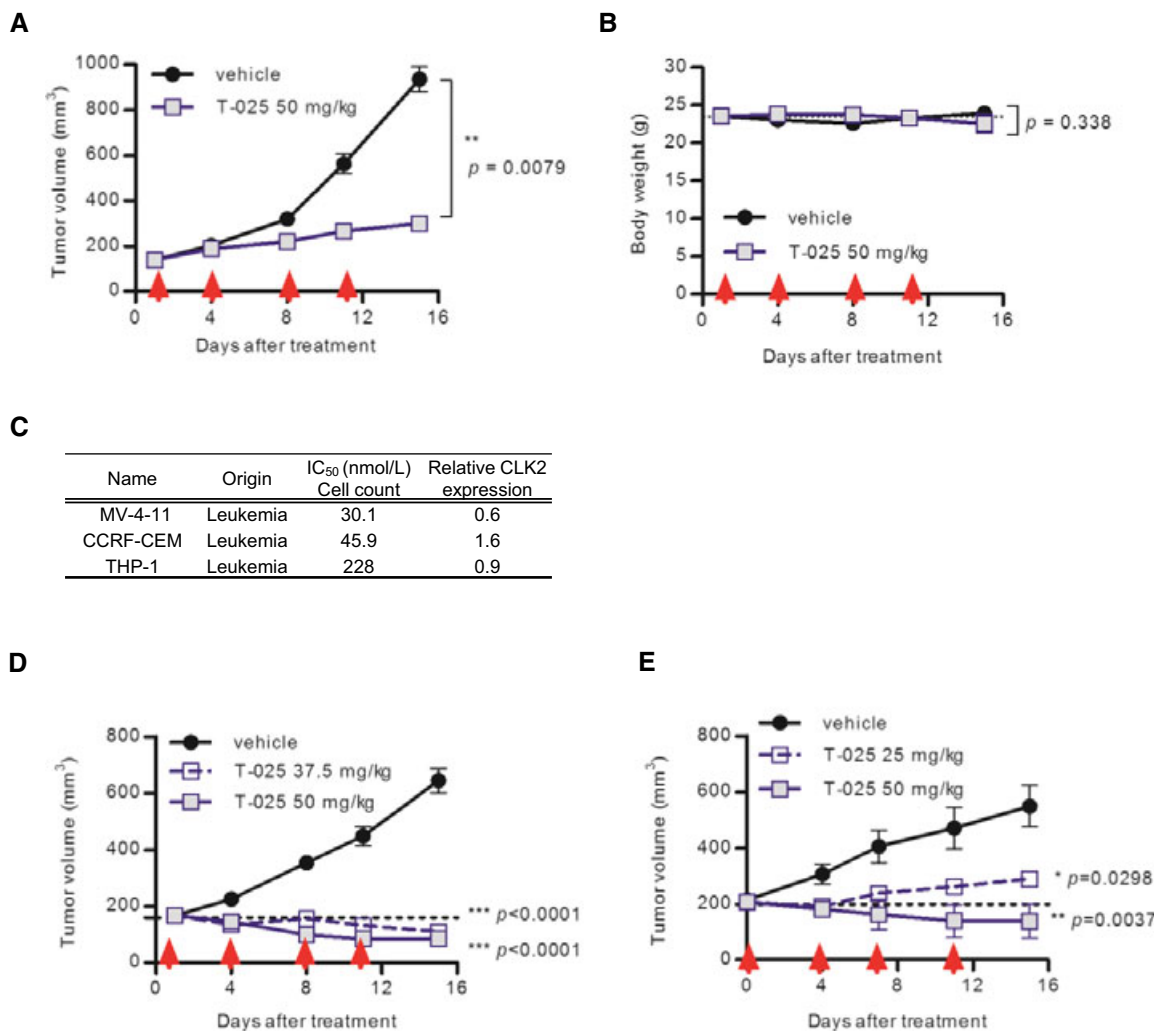

**Figure EV3. Additional *in vivo* data of cell lines.**

A, B Anti-tumor efficacy of T-025 in lung cancer NCI-H1048 xenograft model. Red arrows indicate the day of treatment in twice weekly regimens. Tumor volume (A) and body weight (B) during the treatment cycle are shown.

C Correlation between growth suppressive sensitivity to T-025 and the protein level of CLK2 in the hematological cancer cell lines.

D Anti-tumor efficacy of T-025 in acute myeloid leukemia MV-4-11 xenograft model.

E Anti-tumor efficacy of T-025 in patient-derived xenograft model of acute myeloid leukemia. T-025 was given twice daily at twice weekly.

Data information: In (A, B, and D), data are shown as the mean  $\pm$  s.e.m. ( $n = 5$ ). In (E), data are shown as the mean  $\pm$  s.e.m. ( $n = 3$ ). In (A), a Mann–Whitney test was performed. In (B), an unpaired Student's *t*-test was performed. In (D and E), Tukey's test was performed.

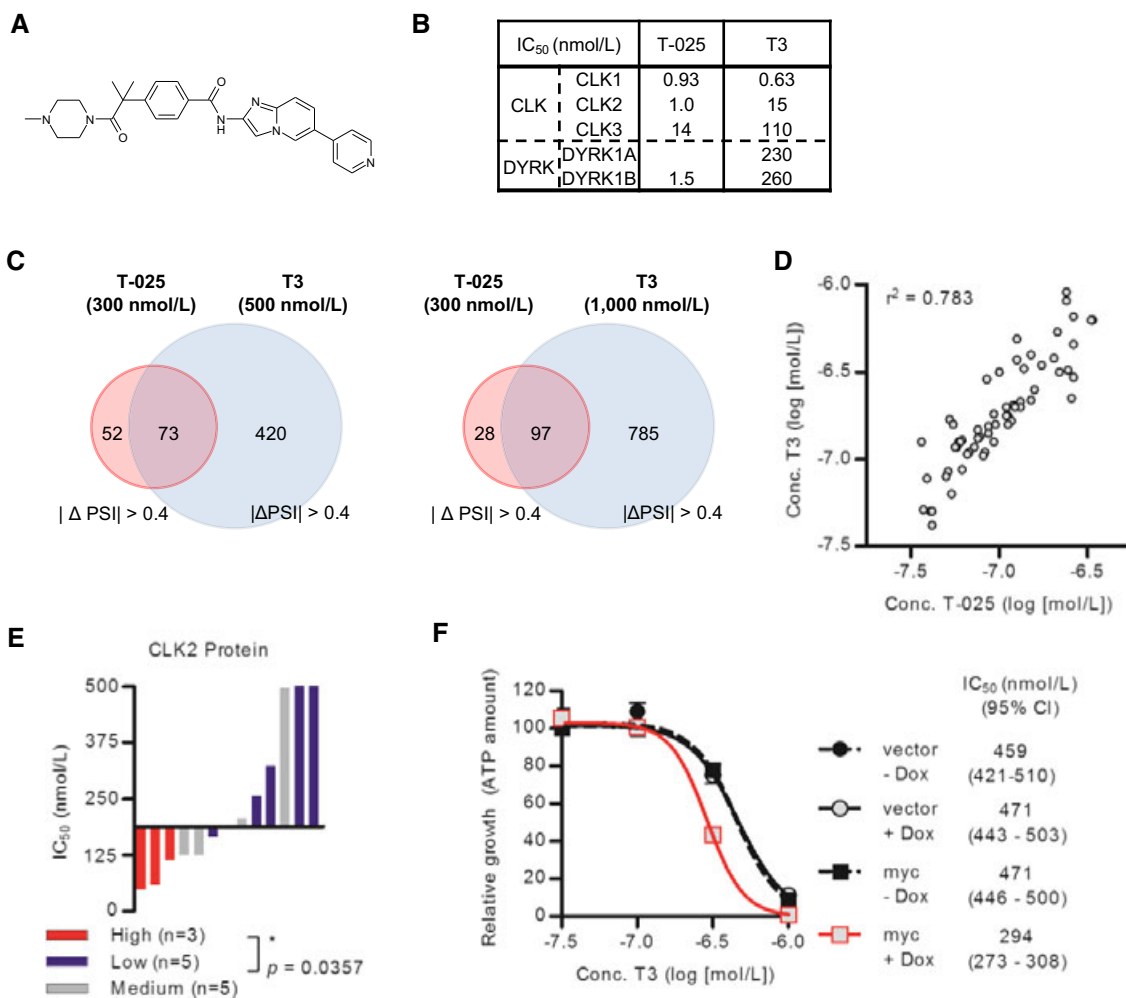

**Figure EV4. The CLK inhibitors T3 and T-025 yielded similar profiles.**

- A Chemical structure of T3.  
 B The enzymatic assay results of T3 and T-025 against the CLK and DYRK family kinases.  
 C Comparison of SEs caused by T-025 and T3.  
 D Correlation between the IC<sub>50</sub> values of T-025 and T3 in a panel of 60 cancer cell lines. Each circle indicates a single cell line. The  $r^2$  value was calculated using Prism.  
 E Correlation between growth suppressive sensitivity to T3 and the protein level of CLK2 in cell lines in solid cancer cell lines. The definition of CLK2 protein expression was same as Fig 4A. A Mann–Whitney test was performed.  
 F Dose–response growth inhibition curve of T3 in MYC-inducible SK-MEL-28 cells. Cells pretreated with Dox for 48 h were additionally incubated with T-025 for 72 h. Data are shown as the means  $\pm$  s.d. of three independent experiments ( $n = 3$ ). IC<sub>50</sub> values and 95% CI were determined by using Prism.

Data information: The chemical structure of T3, the result of enzymatic assay of T3, and AS events modulated by T3 in HCT116 are cited from a previous article (Funnell et al, 2017).

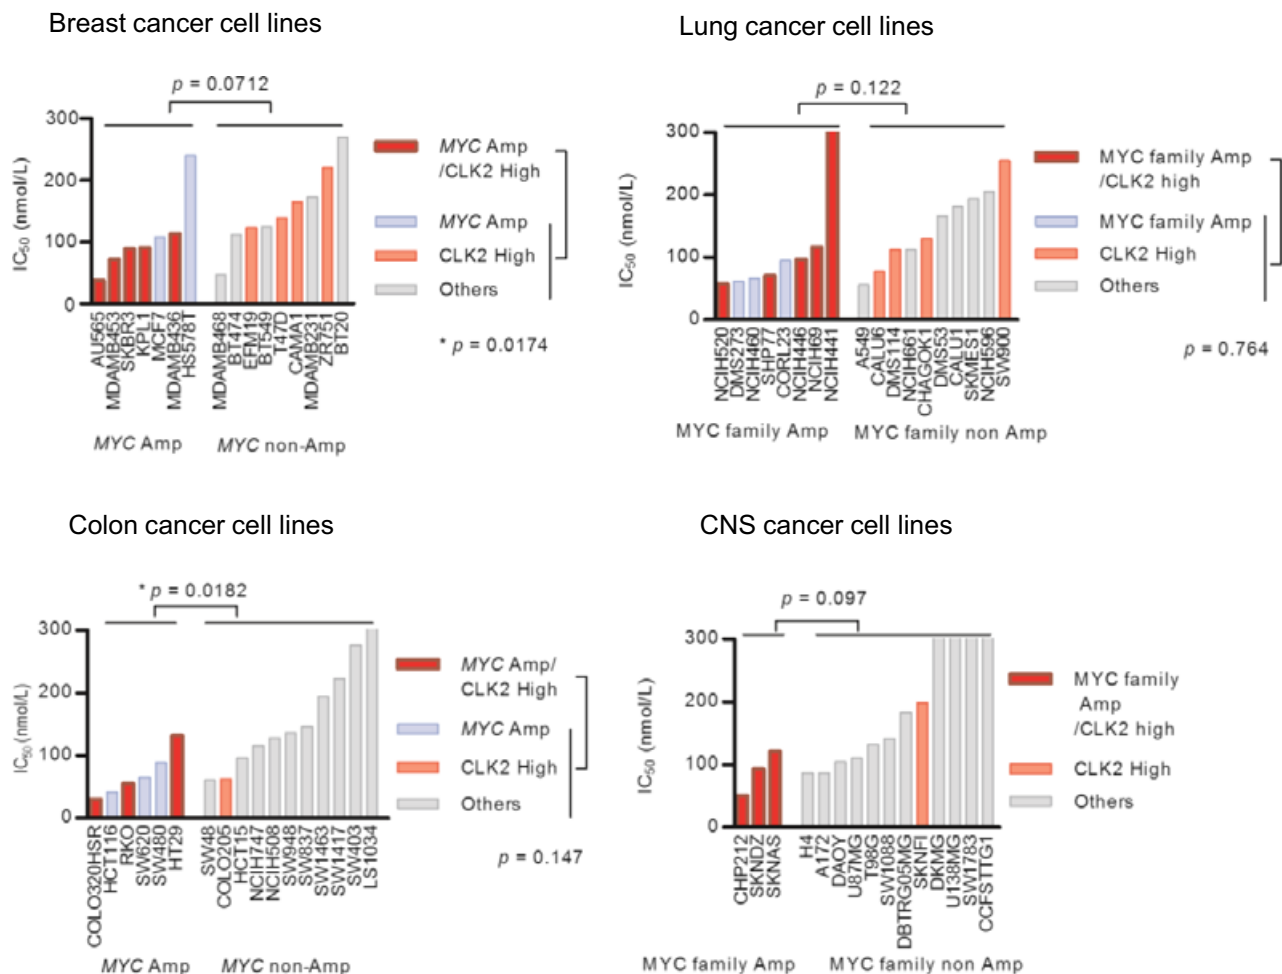

**Figure EV5. Additional analysis of Oncopanel based on the original organ type.**

IC<sub>50</sub> values of the cancer cell lines with both high CLK2 and amplified MYC were compared with that without these biomarkers. A Mann-Whitney test was performed.
