# Supplementary material for: Anti‐tumor efficacy of a novel CLK inhibitor via targeting RNA splicing and MYC‐dependent vulnerability
Source: PubMed Central journal article supplement (PMC5991599; doi:10.15252/emmm.201708289), 2018-05-16

Fig 2A

pSR

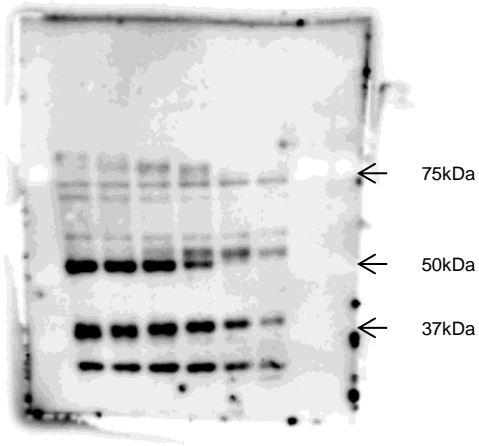

GAPDH

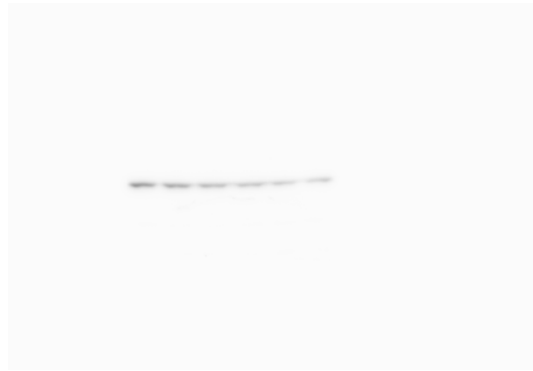

CLK2

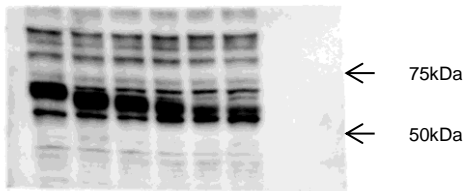

pCLK2

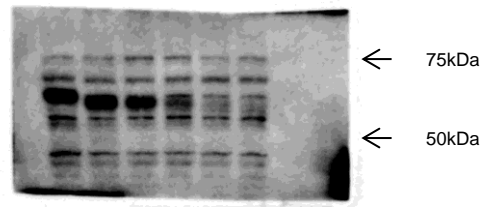

Fig 2E

pCLK2

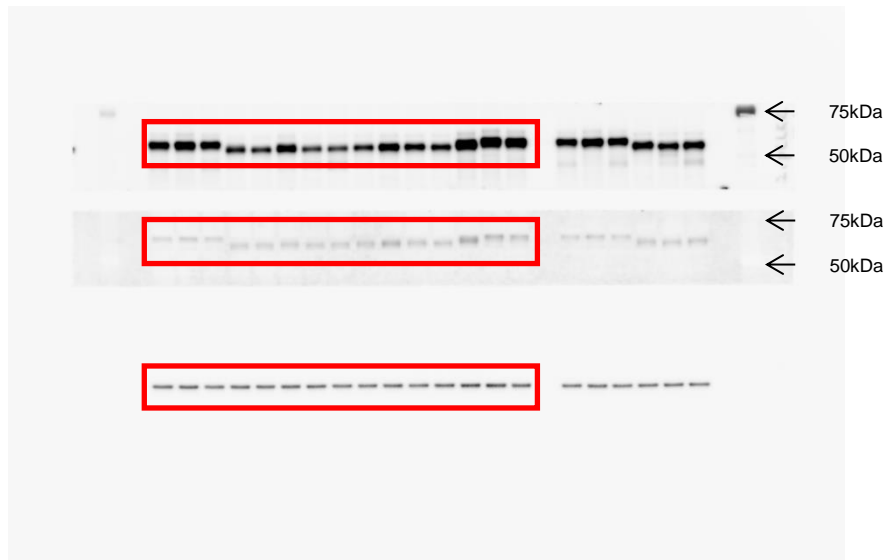

CLK2

HSP90

pSR

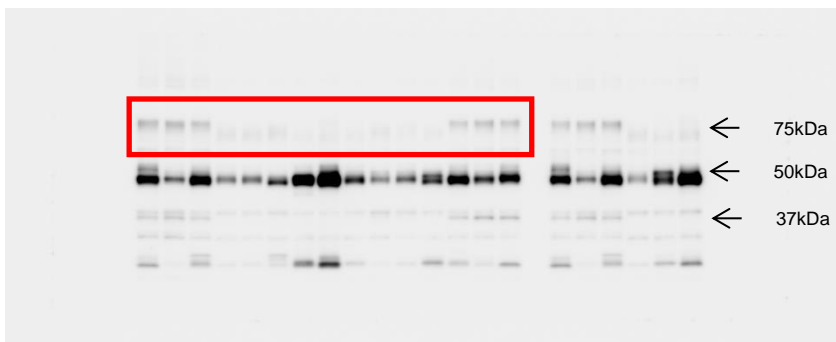

Supplement: EMMM-10-e8289-s003.pdf [file EMMM-10-e8289-s003.pdf]
