# Supplementary material for: Anti‐tumor efficacy of a novel CLK inhibitor via targeting RNA splicing and MYC‐dependent vulnerability
Source: PubMed Central journal article supplement (PMC5991599; doi:10.15252/emmm.201708289), 2018-05-16

Fig 5E

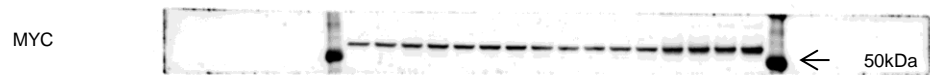

cPARP1

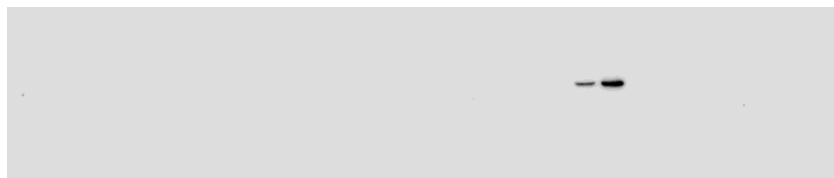

GAPDH

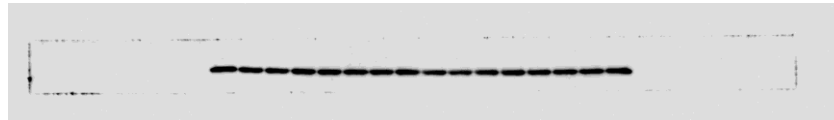

Fig 5H

MYC

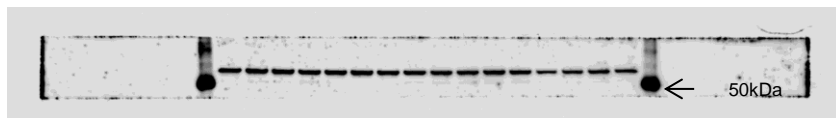

cPARP1

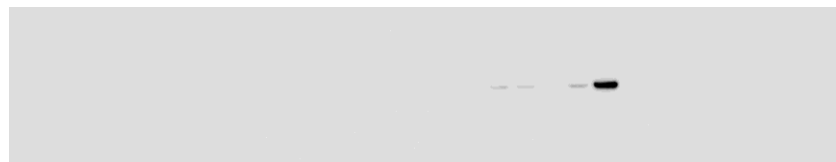

GAPDH

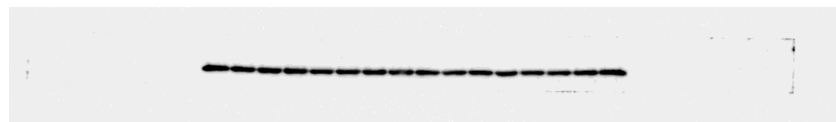

Supplement: EMMM-10-e8289-s005.pdf [file EMMM-10-e8289-s005.pdf]
