# Supplementary material for: Anti‐tumor efficacy of a novel CLK inhibitor via targeting RNA splicing and MYC‐dependent vulnerability
Source: PubMed Central journal article supplement (PMC5991599; doi:10.15252/emmm.201708289), 2018-05-16

Fig 6E

MYC

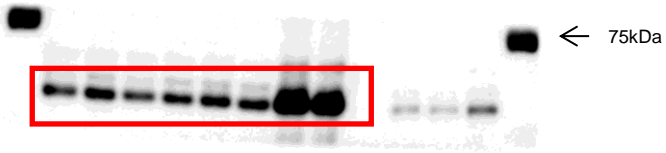

GAPDH

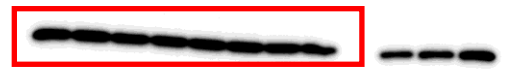

pCLK2

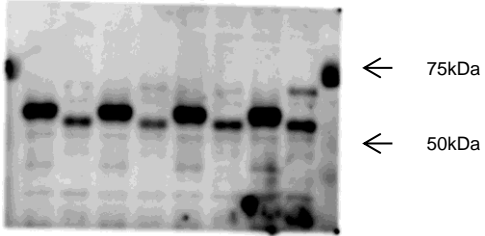

CLK2

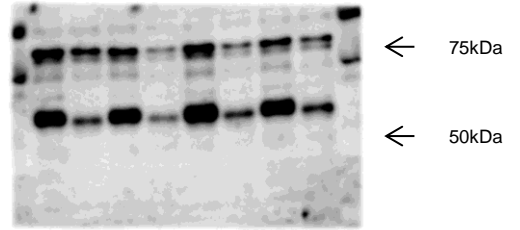

S6K

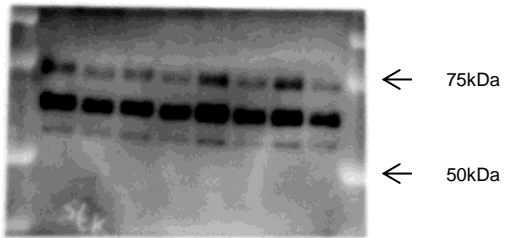

pSR

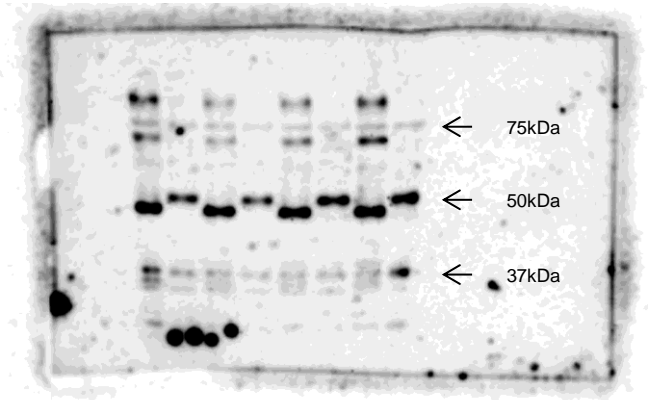

Supplement: EMMM-10-e8289-s006.pdf [file EMMM-10-e8289-s006.pdf]
